# Supplementary material for: Prediction uncertainty assessment of a systems biology model requires a sample of the full probability distribution of its parameters
Source: PeerJ journal article supplement (doi:10.7717/peerj.433), 2014-06-17
Supplement: Supplement_revised.pdf [file Supplement_revised.pdf]

# 1 Supplemental Information to: Prediction 2 uncertainty assessment of a systems 3 biology model requires a sample of the full 4 probability distribution of its parameters

5 Simon van Mourik<sup>1</sup>, Cajo ter Braak<sup>2</sup>, Hans Stigter<sup>3</sup>, and Jaap Molenaar<sup>4</sup>

6 <sup>1,2,3,4</sup>Plant Sciences Group, Wageningen University and Research Center, Wageningen,  
7 The Netherlands

8 <sup>1,4</sup>Netherlands Consortium for Systems Biology, Amsterdam, The Netherlands

## 9 ABSTRACT

10  
11 Keywords:

### 12 General settings

13 The models are calibrated on a time series of 10 equidistantly sampled data points  
14 generated. The MCMC algorithm was carried out in log space with a log-uniform  
15 prior distribution for the parameters with a cutoff (Grandison and Morris, 2008), in  
16 particular:  $p(\log(\theta)) = 1$  for  $\theta \in [10^{-6}\theta^0, 10^6\theta^0]$ , and  $p(\log(\theta)) = 0$  elsewhere, with  
17  $\theta^0$  an initial guess of the parameter value. For the illustrative example we used a uniform  
18 prior for better illustration of the confidence region. For the likelihood, we assumed  
19 Gaussian noise with  $\sigma = 0.1y_d$ . The data was generated without noise in the simulations  
20 (Gutenkunst et al., 2007b), with  $\theta^{PML}$  equal to the true parameter values and also  $\theta^0$   
21 was set to the true value.

22 Time integrations were carried out in the Matlab environment using the `ode15s`  
23 command. DE-MCz was carried out with 4 chains, a thinning rate  $K = 10$ , and in total  
24  $4 \cdot 10^5$  iterations of which  $1 \cdot 10^5$  were used for burn-in. We used Gelman's  $\hat{R}$  statistic to  
25 check for convergence (Gelman and Rubin, 1992).

26 The  $Q$  distribution was computed using 1000 samples from  $\pi(\theta)$ .  $Q$  was computed  
27 in (7) using Riemann summation with 100 time points. Approximating the integral with  
28 only 30 points had practically no effect on the outcomes. When time integrations failed  
29 to converge, the  $Q_{95}$  value was set to zero and not displayed.

30 Extremely low or high values of  $y$  can lead to extreme differences, which tend  
31 to dominate  $Q$ , sometimes even if  $y_p(\theta)$  and  $y_p(\theta^{PML})$  render the same biological  
32 implication. To prevent this, we considered only  $y$  values within a range  $[y^{min}(t), y^{max}(t)]$   
33 in which differences are assumed to be still biologically relevant. We used  $y(t)^{min} = 10^{-6}$   
34 and  $y(t)^{max} = 10^6$ .

### 35 Linearized covariance analysis

36 LCA is based on a quadratic approximation of the log posterior using first order sen-  
37 sitivities of the predicted output towards parameter changes. For any time point  $t$ , the

38 standard deviation on the maximum likelihood prediction  $y(t, \theta^{ML})$  is estimated by  
 39 (Gutenkunst et al., 2007a)

$$\sigma^2(y(t, \theta^{ML})) = \sum_{i,j} \frac{\partial y(t)}{\partial \theta_i} (H^{-1})_{i,j} \frac{\partial y(t)}{\partial \theta_j} \Big|_{\theta^{ML}}. \quad (1)$$

40 Here  $H_{i,j}(\theta^{ML}) = \frac{d^2 \chi^2(\theta^{ML})}{d\theta_i d\theta_j}$  is the Hessian. This assumes a symmetric distribution of  
 41  $y(t)$  around the maximum likelihood prediction. Assuming a normal distribution, the  
 42 95% confidence intervals of  $y(t)$  are then  $y(t, \theta^{ML}) \pm 1.96\sigma(y(t, \theta^{ML}))$ . Replacing the  
 43 linear derivatives in (1) with logarithmic derivatives gave similar results in Fig. 2D.

#### 44 **The models from the BioModels database, and the data sets**

45 The following models were taken from the BioModels database (Li et al., 2010):  
 46 BIOMD0000000229, -011, -003, -005, -035, and -021. Model 1 describes a pro-  
 47 tein network that produces spontaneous oscillations in excitable cells of *Dictyostelium*  
 48 (Laub and Loomis, 1998). It has 7 variables and 14 parameters. We took  $T = 15$ ,  
 49 and  $x(0) = [3.39, 2.45, 1.6, 1.2, 1.13, 0.9, 0.48]$ . Model 2 describes a signaling path-  
 50 way, modeled as a basic 3- stage Mitogen Activated Protein Kinase (MAPK) cas-  
 51 cade in solution (Levchenko et al., 2000). It has 22 variables and 30 parameters.  
 52 We took  $T = 100$  and  $x(0) = [0.4, 0, 0, 0.3, 0, 0, 0, 0, 0.2, 0, 0.2, 0, 0, 0, 0, 0.3, 0.2, 0, 0.3, 0, 0]$ .  
 53 Model 3 describes a minimal cascade model for the mitotic oscillator involving cy-  
 54 clin and cdc2 kinase (Goldbeter, 1991). It has 3 variables and 10 parameters. We  
 55 took  $T = 25$  and  $x(0) = [0.01, 0.01, 0.01]$ . Model 4 describes a model of the inter-  
 56 actions of cdc2 and cyclin (Tyson, 1991). It has 6 variables and 8 parameters. We  
 57 took  $T = 50$  and  $x(0) = [0, 0.75, 0, 0.25, 0, 0]$ . Model 5 describes a genetic circadian  
 58 oscillator model (Vilar et al., 2002). It has 9 variables and 16 parameters. We took  
 59  $T = 50$  and  $x(0) = [0, 0, 1, 0, 1, 0, 0, 0, 0]$ . Model 6 describes circadian oscillations of  
 60 the PER and TIM proteins in *Drosophila* (Leloup and Goldbeter, 1999). It has 10  
 61 variables and 44 parameters. We took  $T = 50$  and  $x(0) = [0.0341, 0.0341, 0.0304, 0.0304,$   
 62  $0.0257, 0.0257, 0.2091, 1.1551, 0.1483, 0.1483]$ . For models with oscillating dynamics we  
 63 created data sets with a time span that covered less than two oscillations for all variables,  
 64 to avoid loss of information on fast dynamics due to a fixed amount of time points. For  
 65 multi-variable models, the time series of individual variables were concatenated. The  
 66 data vector so obtained was used in the likelihood calculations.

#### 67 **The influence of the size of prediction perturbations and base $b$ on the** 68 **range of $Q_{0.95}$**

69 The range sizes in which the prediction uncertainties lie, is quite robust towards changing  
 70 the conditions under which the predictions were generated. For each prediction a  
 71 parameter is multiplied with a factor 100 or 0.01. We varied this factor. Repeating the  
 72 simulation experiment (Fig. 3A) with factor 1000 and 0.001, and with factor 10 and 0.1,  
 73 gave similar results. The sizes of the intervals, and the maximum prediction uncertainty  
 74 for each model remained mostly of the same order of magnitude (Fig. S1).

75 The choice of base  $b$  reflects which differences in a prediction are considered relevant  
 76 and thus influences the magnitude of prediction uncertainty, but it does not change the  
 77 range of uncertainties on a logarithmic scale as in Fig. S1. In this study we used  $b = 2$  in

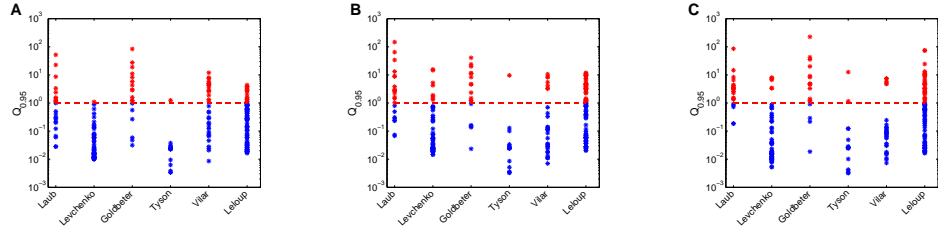

**Figure 1.** Influence of varying the perturbation factor. A) factor 10. B) factor 100. C) factor 1000.

78 equation (7), allowing only relative errors of order 2 or higher to appreciably contribute  
 79 to  $Q$ . Increasing the base from  $b$  to  $c$  ( $c > b$ ) decreases  $Q$  - and therefore  $Q_\alpha$  - with a  
 80 factor  $(\log_b(c))^2$ , but does not change the relative differences between the  $Q_\alpha$  values.  
 81 Hence, the intervals shift downward. For example, increasing the base from 2 to 5  
 82 decreases  $Q_\alpha$  with a factor 5.4.

### 83 Model order reduction

84 The computational effort needed to sample  $\pi(\theta)$  may be large due to the model integra-  
 85 tions required to compute the likelihood  $\chi^2(\theta)$ . A reduction method that is commonly  
 86 applied (Gutenkunst et al., 2007b,a; Brown and Sethna, 2003; Brown et al., 2004) is to  
 87 circumvent the integration step by locally approximating the  $\chi^2$  function with a second  
 88 order Taylor expansion. In this way, time integrations only have to be carried out to  
 89 compute the Hessian. The reduction works as follows. The maximum likelihood param-  
 90 eter vector minimizes  $\chi^2(\theta)$ , so  $\frac{d\chi^2}{d\theta}(\theta^{ML}) = 0$ , and the second order Taylor expansion  
 91 around  $\theta^{ML}$  reads

$$\chi^2(\theta) \approx \chi^2(\theta^{ML}) + \frac{1}{2} \Delta \log \theta^T H(\theta^{ML}) \Delta \log \theta, \quad (2)$$

92 where  $\Delta \log \theta = \log(\theta) - \log(\theta^{ML})$  and  $H_{i,j}(\theta^{ML}) = \frac{d^2 \chi^2(\theta^{ML})}{d \log(\theta_i) d \log(\theta_j)}$ , the positive semidef-  
 93 inite Hessian. The identity  $H = 2J^T J$ , with  $J_{i,j} = \frac{dy_i}{\sigma_i d \log(\theta_j)}$  simplifies numerical compu-  
 94 tations (Brown and Sethna, 2003). It is recommended to use a logarithmic derivative  
 95 (Gutenkunst et al., 2007b), since parameter values may vary over orders of magnitude.  
 96 The parameters are approximately distributed as

$$\log(\theta) \sim N(\log(\theta^{ML}), 2H(\theta^{ML})^{-1}), \quad (3)$$

97 and a sample can be drawn directly from this distribution, i.e., without the need for  
 98 MCMC sampling. We compared the prediction uncertainties estimated with and without  
 99 the reduction (Fig. S2). As could be expected, the  $Q_{0.95}$  ranges are affected by the  
 100 approximation errors. Especially for the Laklo model, the model order reduction  
 101 induces large errors in the estimated prediction uncertainty. In practice, errors in  
 102 estimating  $\theta^{ML}$  may further affect the estimated prediction uncertainty.

### 103 Computational costs

104 We used three different methods: full MCMC, model order reduction, and linearized  
 105 covariance analysis (LCA). MCMC sampling time depends on the number of iterations,

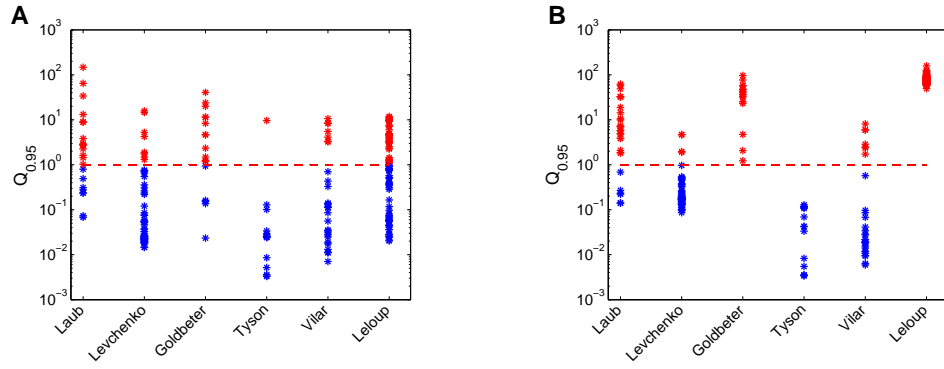

**Figure 2.** A)  $Q_{0.95}$  values obtained via model integrations, and B) via model order reduction.

106 and the time needed for drawing from a normal distribution depends largely on checking  
 107 whether a draw is in or outside the region defined by the prior, which in turns depends on  
 108 the size of the sample. The most time LCA and the model order reduction method need,  
 109 is for the  $p$  time integrations to compute the Hessian, with  $p$  the number of parameters.  
 110 This is much smaller than the number of iterations needed (here a factor of about  $10^4$ ).

111 **Robustness of prediction uncertainty with respect to size of the posterior**  
 112 **sample**

113 Throughout this paper,  $Q_{0.95}$  is computed using 1000 samples representing  $\pi(\theta)$ . To  
 114 check whether this does not influence the qualitative outcomes, the  $Q_{0.95}$  values are  
 115 compared with those obtained via 400 samples (Fig. S3), using the approximation in (2)  
 116 to reduce computational costs. The sizes and locations of the intervals hardly differ with  
 117 the sample size.

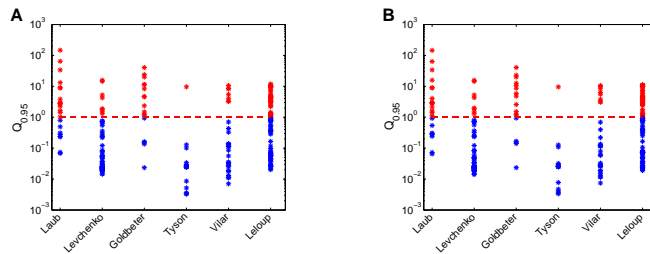

**Figure 3.** A)  $Q_{0.95}$  values obtained with 1000 samples from  $\pi(\theta)$ . B)  $Q_{0.95}$  values obtained with 400 samples.

118 **REFERENCES**

119 Brown, K. S., Hill, C. C., Calero, G. A., Myers, C. R., Lee, K. H., Sethna, J. P., and  
 120 Cerione, R. A. (2004). The statistical mechanics of complex signaling networks:  
 121 nerve growth factor signaling. *Physical biology*, 1(3):184.  
 122 Brown, K. S. and Sethna, J. P. (2003). Statistical mechanical approaches to models with  
 123 many poorly known parameters. *Physical Review E*, 68(2):021904.

- 124 Gelman, A. and Rubin, D. B. (1992). Inference from iterative simulation using multiple  
125 sequences. *Statistical science*, pages 457–472.
- 126 Goldbeter, A. (1991). A minimal cascade model for the mitotic oscillator involving cyclin  
127 and cdc2 kinase. *Proceedings of the National Academy of Sciences*, 88(20):9107–  
128 9111.
- 129 Grandison, S. and Morris, R. J. (2008). Biological pathway kinetic rate constants are  
130 scale-invariant. *Bioinformatics*, 24(6):741–743.
- 131 Gutenkunst, R. N., Casey, F. P., Waterfall, J. J., Myers, C. R., and Sethna, J. P. (2007a).  
132 Extracting falsifiable predictions from sloppy models. *Annals of the New York  
133 Academy of Sciences*, 1115(1):203–211.
- 134 Gutenkunst, R. N., Waterfall, J. J., Casey, F. P., Brown, K. S., Myers, C. R., and Sethna,  
135 J. P. (2007b). Universally sloppy parameter sensitivities in systems biology models.  
136 *PLoS computational biology*, 3(10):e189.
- 137 Laub, M. T. and Loomis, W. F. (1998). A molecular network that produces sponta-  
138 neous oscillations in excitable cells of Dictyostelium. *Molecular biology of the cell*,  
139 9(12):3521–3532.
- 140 Leloup, J. C. and Goldbeter, A. (1999). Chaos and birhythmicity in a model for circadian  
141 oscillations of the PER and TIM proteins in Drosophila. *Journal of Theoretical  
142 Biology*, 198(3):445–459.
- 143 Levchenko, A., Bruck, J., and Sternberg, P. W. (2000). Scaffold proteins may biphasically  
144 affect the levels of mitogen-activated protein kinase signaling and reduce its threshold  
145 properties. *Proceedings of the National Academy of Sciences*, 97(11):5818–5823.
- 146 Li, C., Donizelli, M., Rodriguez, N., Dharuri, H., Endler, L., Chelliah, V., Li, L., He, E.,  
147 Henry, A., Stefan, M. I., et al. (2010). Biomodels database: An enhanced, curated and  
148 annotated resource for published quantitative kinetic models. *BMC systems biology*,  
149 4(1):92.
- 150 Tyson, J. J. (1991). Modeling the cell division cycle: cdc2 and cyclin interactions.  
151 *Proceedings of the National Academy of Sciences*, 88(16):7328–7332.
- 152 Vilar, J. M., Kueh, H. Y., Barkai, N., and Leibler, S. (2002). Mechanisms of noise-  
153 resistance in genetic oscillators. *Proceedings of the National Academy of Sciences*,  
154 99(9):5988–5992.
